# Supplementary material
Source: publisher figshare collection journal article supplement (https://gsajournals.figshare.com/ndownloader/files/13273847)
Supplement: Supplementary file 1 [file 13273847]

## Sheet: Summary
	Table S4. Summary of WGCNA modules.
module	# of peaks	qtl_chr	D2_effect	qtl_marker	qtl_bp	LOD	1.5_LOD_drop
ME1	22	chr4	-	BXD000646	139320163	4.71585	chr4:127517840-140594787
ME2	35	chr7b	+	BXD001022	40713691	26.9602	chr7:40415224-44611998
ME3	162	chr7a	+	BXD001012	35063994	4.42125	chr7:35014902-36450304
		chr12b	+	BXD001701	111037335	6.60322	chr12:110438348-116774277
ME4	72	chr12a	+	BXD001610	16644075	21.7446	chr12:15675297-25131306
ME5	36	chr12a	-	BXD001610	16644075	27.6578	chr12:15675297-25131306
ME6	76	chr13	+	BXD001752	59515437	7.72249	chr13:59369447-60418152
ME7	50	chr13	+	BXD001757	65890145	5.67212	chr13:64837132-67767512
ME8	43	chr13	+	BXD001757	65890145	10.1762	chr13:64837132-67767512
ME9	389	chr13	+	BXD001759	69026189	8.58345	chr13:59515437-71062884
ME10	66	chr13	+	BXD001759	69026189	6.37789	chr13:67767512-71358964
ME11	62	chr13	-	BXD001753	60418152	7.66351	chr13:59515437-64837132
ME12	33	chr13	-	BXD001753	60418152	13.0903	chr13:59515437-64837132
ME13	143	chr13	-	BXD001756	64837132	20.0828	chr13:60418152-65890145
ME14	35	chr13	-	BXD001756	64837132	9.71895	chr13:60418152-65890145
			0

## Sheet: ME1
Peak	chr	start	end
PEAK_LNK_24704	chr6	125330144	125331840
PEAK_LNK_46045	chr12	81531149	81533454
PEAK_LNK_51463	chr14	56666495	56670755
PEAK_LNK_3414	chr1	160193846	160196660
PEAK_LNK_34164	chr9	60686619	60689152
PEAK_LNK_22678	chr6	38380183	38382920
PEAK_LNK_19489	chr5	100516859	100520199
PEAK_LNK_61733	chr18	30271797	30274553
PEAK_LNK_46147	chr12	84283837	84286718
PEAK_LNK_12102	chr3	113628668	113631671
PEAK_LNK_7062	chr2	94156203	94159384
PEAK_LNK_12281	chr3	121290484	121293060
PEAK_LNK_7230	chr2	104814215	104818856
PEAK_LNK_13019	chr3	145116809	145120456
PEAK_LNK_42197	chr11	71002617	71005534
PEAK_LNK_65527	chrX	10214932	10217702
PEAK_LNK_22759	chr6	40470026	40472906
PEAK_LNK_7382	chr2	112260267	112263879
PEAK_LNK_2423	chr1	119911831	119914466
PEAK_LNK_23468	chr6	72551604	72554025
PEAK_LNK_64596	chr19	37171469	37178850
PEAK_LNK_27095	chr7	68127369	68130880

## Sheet: ME2
Peak	chr	start	end
PEAK_LNK_244	chr1	18169678	18171838
PEAK_LNK_46055	chr12	81708874	81710310
PEAK_LNK_50060	chr13	110984298	110985760
PEAK_LNK_48260	chr13	48144406	48145749
PEAK_ALT_22971	chr6	50732897	50733875
PEAK_LNK_26497	chr7	40712907	40714672
PEAK_LNK_37473	chr10	52911899	52913609
PEAK_LNK_24494	chr6	119137846	119139529
PEAKF1_REF_29560	chr8	23600043	23601242
PEAK_LNK_54275	chr15	58599309	58601464
PEAKF1_LNK_12564	chr3	129479240	129484061
PEAK_LNK_41334	chr11	47004545	47005932
PEAK_ALT_24177	chr6	104303569	104304930
PEAK_LNK_37447	chr10	51565012	51566226
PEAK_ALT_56360	chr16	19462901	19464272
PEAK_LNK_17872	chr5	30764428	30766027
PEAK_ALT_54235	chr15	57676411	57677689
PEAK_ALT_52259	chr14	84171027	84172462
PEAK_LNK_56660	chr16	30514780	30516331
PEAK_ALT_47808	chr13	36045080	36046460
PEAK_LNK_787	chr1	40294626	40297003
PEAK_ALT_43798	chr11	110444623	110446034
PEAK_ALT_13443	chr4	6283481	6284908
PEAK_LNK_44443	chr12	8571594	8573817
PEAK_LNK_40509	chr11	11824740	11826343
PEAK_ALT_49881	chr13	104555972	104557230
PEAK_LNK_18736	chr5	71297151	71298756
PEAK_ALT_16866	chr4	142621600	142622854
PEAK_LNK_29765	chr8	28889633	28891402
PEAK_ALT_17433	chr5	8042332	8043674
PEAK_ALT_56403	chr16	20946339	20947528
PEAK_ALT_34640	chr9	73490032	73491182
PEAK_ALT_49422	chr13	92789234	92790875
PEAK_LNK_35355	chr9	100041095	100042802
PEAK_LNK_26838	chr7	52025726	52027355

## Sheet: ME3
Peak	chr	start	end
PEAK_LNK_4	chr1	3556500	3557571
PEAK_ALT_56147	chr16	12838750	12839948
PEAK_ALT_17378	chr5	4698343	4700048
PEAK_ALT_10021	chr3	32676590	32678166
PEAK_ALT_39271	chr10	102433105	102433920
PEAK_ALT_469	chr1	30274244	30275410
PEAK_ALT_4695	chr2	10650981	10651843
PEAK_LNK_41178	chr11	40252453	40254097
PEAK_ALT_4480	chr1	194067121	194068518
PEAK_ALT_61333	chr18	10207556	10209408
PEAK_ALT_12442	chr3	125755637	125756348
PEAK_LNK_55934	chr16	4016467	4017896
PEAK_ALT_58093	chr16	88754408	88755000
PEAK_ALT_1510	chr1	71249598	71250618
PEAK_ALT_41074	chr11	34849314	34850020
PEAK_LNK_6831	chr2	83993805	83994460
PEAK_ALT_39254	chr10	100820155	100823612
PEAK_ALT_12692	chr3	132637790	132639347
PEAK_ALT_36160	chr9	121550862	121552884
PEAK_ALT_22615	chr6	35483371	35485181
PEAK_ALT_45480	chr12	63639238	63640622
PEAK_ALT_3919	chr1	176504202	176505600
PEAK_ALT_13521	chr4	10318782	10320655
PEAKF1_LNK_30581	chr8	59368377	59369850
PEAK_ALT_37382	chr10	45721404	45723019
PEAK_LNK_34746	chr9	77607187	77610301
PEAK_LNK_5837	chr2	52337814	52339884
PEAK_ALT_4496	chr1	195069006	195070002
PEAK_ALT_45050	chr12	42150688	42152088
PEAK_ALT_17394	chr5	5503890	5505813
PEAK_LNK_65215	chr19	55996792	55999271
PEAK_ALT_66796	chrX	141826947	141827758
PEAK_ALT_3033	chr1	146821931	146822861
PEAK_ALT_45468	chr12	62386651	62387865
PEAK_LNK_61519	chr18	18566740	18569196
PEAK_ALT_9747	chr3	18837557	18838627
PEAK_ALT_66211	chrX	79758309	79759452
PEAK_ALT_61697	chr18	26216858	26218841
PEAK_ALT_40722	chr11	21209120	21210504
PEAK_LNK_49916	chr13	106072837	106074664
PEAK_ALT_49258	chr13	83262706	83264140
PEAK_ALT_58594	chr17	7853787	7856519
PEAK_ALT_28037	chr7	108706145	108706933
PEAK_ALT_22313	chr6	27509053	27510290
PEAK_ALT_57688	chr16	70114868	70115744
PEAK_ALT_53474	chr15	20745195	20745987
PEAK_ALT_52490	chr14	99531906	99533357
PEAK_LNK_7107	chr2	98979304	98981525
PEAK_LNK_64418	chr19	30366268	30367928
PEAK_ALT_46329	chr12	90817242	90818474
PEAK_ALT_13441	chr4	6226227	6227819
PEAK_LNK_986	chr1	49986728	49987724
PEAK_ALT_40688	chr11	20406213	20408183
PEAK_ALT_2992	chr1	143592497	143593629
PEAK_ALT_12198	chr3	117776593	117777237
PEAK_LNK_37075	chr10	37449760	37452007
PEAK_LNK_33854	chr9	51668741	51670148
PEAK_LNK_61445	chr18	14466732	14467961
PEAK_ALT_61742	chr18	31044579	31045404
PEAK_LNK_12525	chr3	128201934	128203572
PEAK_ALT_46130	chr12	83994796	83996294
PEAK_ALT_67023	chrX	162373301	162374847
PEAK_ALT_13279	chr3	153254981	153256360
PEAK_ALT_55315	chr15	93182223	93183574
PEAK_LNK_5812	chr2	51667286	51668292
PEAK_ALT_6523	chr2	74510141	74511744
PEAK_ALT_19052	chr5	82068983	82070220
PEAK_ALT_9581	chr3	7674498	7675858
PEAK_ALT_1110	chr1	55482637	55483281
PEAK_ALT_28259	chr7	116792157	116793291
PEAK_ALT_57713	chr16	71314437	71315639
PEAK_LNK_9567	chr3	6136869	6139809
PEAK_ALT_27572	chr7	88601254	88602467
PEAK_ALT_52724	chr14	106832480	106834017
PEAK_ALT_10309	chr3	45213580	45215050
PEAK_ALT_50759	chr14	27591258	27592850
PEAK_ALT_36587	chr10	18558615	18560590
PEAK_ALT_2532	chr1	127700337	127702293
PEAK_LNK_54984	chr15	84097082	84098563
PEAK_ALT_54219	chr15	56597458	56597946
PEAK_ALT_23983	chr6	95061417	95062740
PEAK_ALT_37818	chr10	63511978	63512713
PEAK_LNK_50166	chr13	113176424	113177362
PEAK_ALT_45342	chr12	56102602	56104119
PEAK_ALT_6104	chr2	63599644	63600611
PEAK_LNK_22633	chr6	36632650	36635765
PEAK_LNK_33776	chr9	49164810	49165797
PEAK_LNK_6742	chr2	79774975	79777358
PEAK_ALT_28205	chr7	114948717	114950469
PEAK_LNK_56950	chr16	37476010	37478363
PEAK_LNK_61115	chr17	88266909	88269803
PEAK_ALT_58900	chr17	22875997	22878072
PEAK_LNK_57414	chr16	55940587	55942648
PEAK_LNK_10732	chr3	63080465	63082961
PEAK_LNK_15058	chr4	87556411	87558895
PEAK_ALT_2963	chr1	141318342	141319404
PEAK_ALT_57636	chr16	66524678	66525551
PEAK_ALT_17472	chr5	12143496	12144806
PEAK_LNK_47090	chr13	3531164	3533120
PEAK_LNK_21964	chr6	8196560	8198140
PEAK_ALT_6143	chr2	65075748	65076515
PEAK_ALT_24172	chr6	103964306	103964870
PEAK_ALT_20694	chr5	125885349	125886594
PEAK_ALT_34047	chr9	57479776	57480370
PEAK_ALT_47298	chr13	16100093	16101440
PEAK_ALT_24175	chr6	104172872	104173628
PEAK_ALT_58829	chr17	16920902	16922523
PEAK_ALT_65214	chr19	55951444	55952889
PEAK_ALT_60703	chr17	75852416	75853833
PEAK_ALT_43055	chr11	95854842	95855847
PEAK_ALT_4520	chr2	3834373	3835196
PEAK_ALT_29354	chr8	13748571	13750005
PEAK_ALT_30582	chr8	59370767	59372176
PEAK_ALT_36431	chr10	11340322	11341268
PEAK_ALT_15684	chr4	116187395	116188342
PEAKF1_LNK_17861	chr5	30510301	30511870
PEAK_ALT_11587	chr3	95954204	95955536
PEAK_LNK_26369	chr7	36043750	36047558
PEAK_ALT_19066	chr5	83783307	83783595
PEAK_ALT_45916	chr12	77411213	77412168
PEAK_ALT_45707	chr12	72202016	72203098
PEAK_ALT_45145	chr12	50685058	50686020
PEAK_ALT_53978	chr15	41243788	41244550
PEAK_ALT_41191	chr11	40971978	40972774
PEAK_ALT_66865	chrX	150529286	150530038
PEAK_ALT_52963	chr14	120060724	120061982
PEAK_ALT_36997	chr10	32045829	32046578
PEAK_ALT_6713	chr2	78766305	78767775
PEAK_ALT_10821	chr3	66901592	66902317
PEAK_ALT_20929	chr5	132728590	132729281
PEAK_ALT_22003	chr6	10906611	10907519
PEAK_ALT_10727	chr3	62638363	62639725
PEAK_ALT_37434	chr10	50813938	50815804
PEAK_ALT_52383	chr14	93216378	93216950
PEAK_ALT_31705	chr8	98255981	98256608
PEAKF1_LNK_2937	chr1	139122632	139123935
PEAK_ALT_22167	chr6	18996681	18998031
PEAK_ALT_1125	chr1	56464770	56465578
PEAK_ALT_14585	chr4	58224015	58224883
PEAK_ALT_62291	chr18	47831363	47832462
PEAK_ALT_40793	chr11	23850835	23851868
PEAK_ALT_26827	chr7	51269506	51271264
PEAK_ALT_57958	chr16	83136784	83137917
PEAK_ALT_58572	chr17	6842643	6844362
PEAK_ALT_2955	chr1	140648979	140649752
PEAK_ALT_62411	chr18	53566640	53567399
PEAK_LNK_37415	chr10	49172812	49174845
PEAK_ALT_40561	chr11	16358579	16359278
PEAK_ALT_28645	chr7	128842061	128843441
PEAK_ALT_25592	chr7	6948072	6948779
PEAK_ALT_61196	chr17	93039488	93040445
PEAK_ALT_8335	chr2	147871087	147871921
PEAK_ALT_2466	chr1	121737376	121738019
PEAK_ALT_10235	chr3	39791612	39792889
PEAK_ALT_27957	chr7	102619750	102620722
PEAK_ALT_19051	chr5	82043298	82044160
PEAK_ALT_44562	chr12	14675894	14676671
PEAK_ALT_6248	chr2	68769870	68770413
PEAK_ALT_37054	chr10	36225321	36226396
PEAK_LNK_47110	chr13	4211629	4212718
PEAK_ALT_65900	chrX	51728964	51729460
PEAK_ALT_53451	chr15	18615337	18616785

## Sheet: ME4
Peak	chr	start	end
PEAK_ALT_36772	chr10	23463307	23464055
PEAK_ALT_30442	chr8	50986661	50988131
PEAK_ALT_53421	chr15	15789191	15789782
PEAK_LNK_2960	chr1	141139206	141140654
PEAK_ALT_53514	chr15	23737650	23739146
PEAK_ALT_60005	chr17	50253142	50254391
PEAK_ALT_61505	chr18	16849304	16850450
PEAK_ALT_61524	chr18	19365980	19367498
PEAK_ALT_49326	chr13	87667671	87668703
PEAK_ALT_14774	chr4	71072209	71072831
PEAK_ALT_37514	chr10	54885852	54887433
PEAK_ALT_19159	chr5	89515200	89515850
PEAK_ALT_44615	chr12	17506829	17508017
PEAK_ALT_198	chr1	15171531	15173714
PEAK_ALT_32876	chr9	13753647	13754334
PEAK_ALT_47581	chr13	27445061	27447635
PEAK_ALT_61729	chr18	30015977	30016774
PEAK_ALT_970	chr1	48332511	48333802
PEAK_ALT_11280	chr3	87599345	87601444
PEAK_ALT_5916	chr2	57679826	57681658
PEAK_ALT_4007	chr1	179820157	179820965
PEAK_ALT_974	chr1	48737045	48737875
PEAK_ALT_32834	chr9	8997150	8998042
PEAK_ALT_23558	chr6	81503699	81504992
PEAK_LNK_39142	chr10	96918799	96920644
PEAK_ALT_45140	chr12	50460695	50461758
PEAK_LNK_30334	chr8	47479757	47481518
PEAK_LNK_31077	chr8	79211938	79213880
PEAK_ALT_65825	chrX	46137064	46137963
PEAK_ALT_59394	chr17	32595966	32597126
PEAK_ALT_57946	chr16	82206901	82207708
PEAK_ALT_40458	chr11	8274196	8274779
PEAK_LNK_17235	chr4	153827002	153828804
PEAK_ALT_64045	chr19	18919131	18920258
PEAK_ALT_57947	chr16	82212076	82212896
PEAK_ALT_2981	chr1	142611268	142612084
PEAK_ALT_493	chr1	31734564	31735404
PEAK_LNK_49129	chr13	75448462	75449707
PEAK_ALT_35134	chr9	93322664	93323609
PEAK_ALT_44396	chr12	5617840	5619056
PEAK_ALT_28012	chr7	106560504	106562060
PEAK_ALT_8369	chr2	149387484	149388787
PEAK_LNK_44103	chr11	117401521	117403681
PEAK_ALT_9676	chr3	12369980	12370947
PEAK_LNK_52957	chr14	119982366	119984378
PEAK_ALT_9572	chr3	6800472	6801619
PEAK_LNK_18247	chr5	45657448	45659795
PEAK_LNK_64160	chr19	23434141	23436785
PEAK_ALT_24583	chr6	121957995	121959524
PEAK_ALT_13429	chr4	5465273	5466158
PEAK_ALT_23236	chr6	58247225	58248442
PEAK_ALT_23235	chr6	58060657	58062264
PEAK_ALT_54905	chr15	81975372	81976292
PEAK_ALT_975	chr1	48741856	48742653
PEAK_ALT_23702	chr6	85712197	85713454
PEAK_ALT_44533	chr12	12657938	12658835
PEAK_LNK_26405	chr7	37045370	37046413
PEAK_LNK_18662	chr5	66763812	66765269
PEAK_LNK_42255	chr11	72746453	72748427
PEAK_LNK_37095	chr10	39096385	39099017
PEAK_ALT_46096	chr12	83005218	83006841
PEAK_LNK_39550	chr10	113502543	113504211
PEAK_ALT_410	chr1	24418321	24419877
PEAK_LNK_57251	chr16	48189554	48191626
PEAK_ALT_19645	chr5	103950232	103951140
PEAK_ALT_30292	chr8	46816116	46817598
PEAK_LNK_65110	chr19	53050872	53053223
PEAK_ALT_67062	chrX	164894947	164895708
PEAKF1_LNK_32877	chr9	13758281	13759415
PEAK_ALT_52348	chr14	90279504	90280213
PEAK_ALT_15828	chr4	119930481	119931273
PEAK_ALT_40411	chr11	6149651	6151261

## Sheet: ME5
Peak	chr	start	end
PEAK_REF_29020	chr7	142920888	142921971
PEAK_LNK_58632	chr17	8862135	8864371
PEAK_LNK_64388	chr19	29716990	29719930
PEAK_LNK_49204	chr13	80920721	80922565
PEAK_REF_23704	chr6	85904499	85905392
PEAK_ALT_58581	chr17	7540784	7542128
PEAK_LNK_47623	chr13	29389101	29391035
PEAK_LNK_8268	chr2	145928145	145929887
PEAK_LNK_15185	chr4	95556295	95559145
PEAK_REF_7304	chr2	106733993	106735211
PEAK_REF_23815	chr6	88706249	88707554
PEAK_REF_4414	chr1	191237194	191238531
PEAK_REF_10715	chr3	61833085	61833991
PEAK_REF_18233	chr5	44972935	44973837
PEAK_REF_57141	chr16	44049614	44050956
PEAK_LNK_28143	chr7	112619949	112621683
PEAK_LNK_33815	chr9	50500094	50502124
PEAK_LNK_28829	chr7	135735318	135736935
PEAK_REF_47401	chr13	21034019	21035140
PEAK_LNK_6654	chr2	76906787	76909827
PEAK_LNK_58416	chr16	96357514	96358499
PEAK_LNK_37179	chr10	40717926	40720312
PEAK_LNK_8723	chr2	158819006	158820846
PEAK_REF_61228	chr18	4313459	4314475
PEAK_LNK_34097	chr9	58473778	58476138
PEAKF1_REF_22987	chr6	51162271	51163300
PEAK_REF_29009	chr7	142490460	142491734
PEAK_REF_13022	chr3	145235689	145236976
PEAK_REF_35524	chr9	104051078	104052886
PEAK_LNK_52038	chr14	75419352	75421322
PEAKF1_ALT_23703	chr6	85894421	85895275
PEAK_REF_31790	chr8	105011080	105012021
PEAK_LNK_4625	chr2	6883497	6885258
PEAK_LNK_32060	chr8	110046619	110048150
PEAK_REF_45386	chr12	56985549	56986684
PEAK_LNK_15205	chr4	96590240	96592426

## Sheet: ME6
Peak	chr	start	end
PEAK_LNK_2493	chr1	125680342	125681801
PEAK_LNK_39843	chr10	119646075	119647754
PEAK_LNK_21561	chr5	147357791	147359869
PEAK_LNK_44046	chr11	116504048	116505271
PEAK_ALT_21147	chr5	136997916	136999639
PEAK_LNK_4013	chr1	179865201	179869012
PEAK_LNK_65103	chr19	52941448	52943042
PEAK_LNK_65125	chr19	53296255	53297829
PEAK_LNK_16789	chr4	141259053	141260629
PEAK_LNK_2684	chr1	132821971	132823522
PEAK_LNK_11391	chr3	89330813	89333114
PEAKF1_REF_9117	chr2	168831165	168832191
PEAK_LNK_55760	chr15	101015284	101017510
PEAK_LNK_13275	chr3	153199921	153202112
PEAK_LNK_14287	chr4	46367160	46368862
PEAK_LNK_60604	chr17	71671596	71673852
PEAK_LNK_28520	chr7	126700759	126702254
PEAK_LNK_62653	chr18	61625591	61627198
PEAK_LNK_31866	chr8	106411781	106413804
PEAK_LNK_2785	chr1	135233967	135235569
PEAKF1_LNK_10413	chr3	51526635	51527998
PEAK_LNK_39730	chr10	117682224	117684758
PEAK_REF_8849	chr2	163583957	163584720
PEAK_LNK_37278	chr10	42919861	42921070
PEAK_LNK_58364	chr16	94781551	94785256
PEAK_ALT_60845	chr17	80496830	80497778
PEAK_LNK_43803	chr11	110509817	110512081
PEAK_LNK_20806	chr5	129225397	129226786
PEAK_LNK_66830	chrX	144286901	144288633
PEAK_LNK_20526	chr5	122635020	122638103
PEAK_ALT_51387	chr14	55078308	55080263
PEAK_LNK_20564	chr5	123156507	123158006
PEAK_LNK_56801	chr16	33138280	33139677
PEAK_LNK_62664	chr18	61736268	61739669
PEAK_LNK_2998	chr1	143769838	143771203
PEAK_LNK_44377	chr12	5079843	5081742
PEAK_LNK_40380	chr11	5516129	5517349
PEAK_LNK_17028	chr4	149825384	149826399
PEAKF1_LNK_59800	chr17	45660540	45666943
PEAK_LNK_32924	chr9	15470343	15471585
PEAK_LNK_45993	chr12	80145396	80147474
PEAK_REF_21369	chr5	142727894	142728658
PEAK_LNK_33939	chr9	54517936	54520025
PEAK_REF_43122	chr11	96691810	96692655
PEAK_LNK_38103	chr10	70303175	70304746
PEAK_LNK_63354	chr18	82110865	82113258
PEAK_LNK_28221	chr7	115568202	115569233
PEAKF1_REF_37829	chr10	63761647	63763125
PEAKF1_LNK_39992	chr10	122116178	122117501
PEAKF1_REF_17158	chr4	151982705	151983867
PEAKF1_LNK_65313	chr19	57764493	57765735
PEAK_LNK_9136	chr2	169005073	169007288
PEAK_LNK_1238	chr1	60487868	60489271
PEAK_LNK_21779	chr5	150402472	150403849
PEAKF1_LNK_57124	chr16	43698551	43701529
PEAK_LNK_46082	chr12	82488979	82490103
PEAK_LNK_41980	chr11	67099162	67101860
PEAK_LNK_21780	chr5	150408598	150410396
PEAK_LNK_62062	chr18	38202443	38204137
PEAK_LNK_32088	chr8	110591898	110593395
PEAK_LNK_51851	chr14	68337181	68339133
PEAK_LNK_16033	chr4	126084477	126085791
PEAK_ALT_37234	chr10	41963231	41964020
PEAK_LNK_61629	chr18	24099965	24101621
PEAK_LNK_45245	chr12	53291369	53294676
PEAK_LNK_9610	chr3	9127651	9129052
PEAK_ALT_30211	chr8	45354852	45355996
PEAK_ALT_45697	chr12	72061753	72062937
PEAK_LNK_9079	chr2	168147755	168149117
PEAK_LNK_56900	chr16	35833404	35835049
PEAK_LNK_54298	chr15	59249905	59251447
PEAK_LNK_7548	chr2	119014632	119016503
PEAK_LNK_14325	chr4	47425213	47426948
PEAKF1_REF_36836	chr10	24796538	24797717
PEAK_LNK_676	chr1	37578865	37580859
PEAK_LNK_31596	chr8	94682819	94684154

## Sheet: ME7
Peak	chr	start	end
PEAK_ALT_34880	chr9	83084681	83085978
PEAK_ALT_15144	chr4	92522991	92524715
PEAK_ALT_29180	chr8	7163163	7164595
PEAK_ALT_34725	chr9	76821534	76822672
PEAK_ALT_65174	chr19	54271868	54273442
PEAK_ALT_27975	chr7	104180901	104182559
PEAK_ALT_5594	chr2	43116564	43118369
PEAK_LNK_35126	chr9	92808052	92809815
PEAK_ALT_45890	chr12	76724338	76726330
PEAK_LNK_10605	chr3	57271676	57273765
PEAK_ALT_55467	chr15	96240739	96242974
PEAK_ALT_10337	chr3	48705797	48707095
PEAK_ALT_14765	chr4	70421088	70422755
PEAK_ALT_13270	chr3	153101952	153103268
PEAK_LNK_53866	chr15	37910929	37912408
PEAK_LNK_145	chr1	13014502	13016239
PEAK_ALT_53116	chr15	3373070	3374292
PEAK_ALT_50665	chr14	24100732	24101548
PEAK_ALT_7121	chr2	101111784	101113067
PEAK_ALT_51471	chr14	56876977	56877347
PEAK_ALT_4737	chr2	11864935	11865615
PEAK_ALT_55122	chr15	88588816	88589199
PEAK_ALT_53145	chr15	5026111	5026853
PEAK_ALT_10998	chr3	76995859	76997105
PEAK_ALT_19080	chr5	84452528	84453708
PEAK_ALT_31677	chr8	96008697	96009470
PEAK_ALT_7331	chr2	108420662	108421499
PEAK_ALT_55299	chr15	92822066	92824073
PEAK_ALT_50763	chr14	27701927	27703201
PEAK_ALT_31676	chr8	96007600	96008612
PEAKF1_LNK_41200	chr11	41761621	41763465
PEAK_ALT_46564	chr12	102367911	102370514
PEAK_ALT_12486	chr3	127445763	127446826
PEAK_ALT_4851	chr2	18398830	18400741
PEAK_ALT_4855	chr2	18496952	18498303
PEAK_ALT_29255	chr8	9947417	9948419
PEAK_LNK_41515	chr11	52323944	52325824
PEAK_ALT_43286	chr11	99191954	99192676
PEAK_ALT_66859	chrX	150366517	150368772
PEAK_ALT_36440	chr10	11767388	11768888
PEAK_ALT_51173	chr14	48111211	48112352
PEAK_ALT_21927	chr6	6365916	6367009
PEAK_ALT_37442	chr10	51250613	51251657
PEAK_ALT_45540	chr12	67059540	67062552
PEAK_LNK_46083	chr12	82508483	82510150
PEAK_ALT_61481	chr18	15704880	15705709
PEAK_ALT_54012	chr15	42942274	42942989
PEAK_ALT_32888	chr9	14063362	14064174
PEAK_ALT_3962	chr1	177969028	177970540
PEAK_ALT_21464	chr5	144657231	144658345

## Sheet: ME8
Peak	chr	start	end
PEAK_LNK_29246	chr8	9792614	9793804
PEAK_REF_41388	chr11	49650324	49651310
PEAK_LNK_44837	chr12	33034844	33036768
PEAK_LNK_54401	chr15	65609204	65611121
PEAK_LNK_3173	chr1	153190635	153192157
PEAK_LNK_2297	chr1	106451541	106452972
PEAK_LNK_14386	chr4	49769790	49772086
PEAK_LNK_39562	chr10	114367108	114368604
PEAK_LNK_5977	chr2	59521858	59523175
PEAK_LNK_17831	chr5	29536558	29538532
PEAK_LNK_63524	chr18	88331982	88334039
PEAK_LNK_51741	chr14	65293923	65296165
PEAK_LNK_38734	chr10	86191890	86194568
PEAK_LNK_25875	chr7	24267791	24271114
PEAK_ALT_60535	chr17	69768075	69769434
PEAK_ALT_27289	chr7	75821136	75822524
PEAK_LNK_66788	chrX	141237953	141240011
PEAK_LNK_45923	chr12	77831071	77832725
PEAK_LNK_10588	chr3	56127572	56129648
PEAK_LNK_22724	chr6	39462633	39463972
PEAK_LNK_23559	chr6	81520934	81522529
PEAK_LNK_57331	chr16	50869747	50870772
PEAK_ALT_37561	chr10	57570032	57571853
PEAK_LNK_7203	chr2	104095440	104096851
PEAK_LNK_127	chr1	12366749	12368117
PEAK_ALT_55485	chr15	96652545	96653526
PEAK_LNK_60350	chr17	64873512	64874623
PEAK_LNK_54060	chr15	46648458	46649897
PEAK_LNK_11231	chr3	86050186	86051703
PEAK_LNK_22522	chr6	33269945	33272489
PEAK_ALT_7974	chr2	131870440	131871435
PEAK_ALT_7162	chr2	102620026	102621436
PEAK_REF_13620	chr4	14733128	14733828
PEAK_ALT_8230	chr2	144308428	144309387
PEAK_LNK_61285	chr18	7439925	7442200
PEAKF1_REF_60351	chr17	64875797	64877107
PEAK_LNK_659	chr1	37041956	37044621
PEAK_LNK_60799	chr17	79660956	79662499
PEAK_LNK_25204	chr6	142808003	142808947
PEAK_LNK_30538	chr8	57498068	57499971
PEAK_LNK_53430	chr15	16470095	16471616
PEAK_LNK_57231	chr16	46119349	46120764
PEAK_LNK_5734	chr2	48806031	48808033

## Sheet: ME9
Peak	chr	start	end
PEAK_LNK_41004	chr11	32850686	32852750
PEAK_LNK_39453	chr10	110985782	110987722
PEAK_LNK_21393	chr5	143152229	143154839
PEAK_LNK_12633	chr3	130999997	131001699
PEAK_LNK_45710	chr12	72256498	72258787
PEAK_LNK_38329	chr10	76905340	76907292
PEAK_LNK_26792	chr7	49400020	49401704
PEAKF1_REF_1945	chr1	87070368	87071493
PEAK_LNK_11672	chr3	97331124	97333095
PEAK_LNK_24114	chr6	100713233	100714641
PEAK_LNK_37166	chr10	40520773	40523030
PEAK_LNK_56713	chr16	31543761	31548661
PEAKF1_REF_18387	chr5	53298951	53300022
PEAKF1_REF_27977	chr7	104205733	104207082
PEAK_ALT_37242	chr10	42179173	42180556
PEAK_LNK_50899	chr14	32683429	32685780
PEAK_ALT_29542	chr8	23165431	23167100
PEAK_ALT_24748	chr6	126864680	126865851
PEAK_REF_9865	chr3	27060133	27061107
PEAK_ALT_22477	chr6	31623733	31624853
PEAK_LNK_44831	chr12	32877053	32879223
PEAK_LNK_40335	chr11	4307823	4309407
PEAK_LNK_3500	chr1	162648054	162650013
PEAK_ALT_17051	chr4	150083324	150084458
PEAK_LNK_40660	chr11	19754286	19755162
PEAK_LNK_61082	chr17	87616496	87617476
PEAK_LNK_24123	chr6	100975551	100976989
PEAK_LNK_22543	chr6	34102146	34104296
PEAK_LNK_45572	chr12	69287149	69289106
PEAK_LNK_32635	chr8	124670327	124672054
PEAK_LNK_46538	chr12	100877982	100879544
PEAK_LNK_6657	chr2	76931689	76933102
PEAK_ALT_3983	chr1	178829229	178831249
PEAK_ALT_29492	chr8	22243040	22244114
PEAK_ALT_54941	chr15	83075543	83076599
PEAK_LNK_8939	chr2	165050651	165052089
PEAK_LNK_46450	chr12	98687879	98690260
PEAK_LNK_45981	chr12	79863959	79866899
PEAKF1_REF_50852	chr14	31220415	31221922
PEAK_ALT_14103	chr4	41093371	41094374
PEAK_LNK_14060	chr4	40175377	40176935
PEAK_ALT_64708	chr19	40934823	40936402
PEAK_LNK_45631	chr12	70532146	70533614
PEAK_LNK_64371	chr19	29421534	29423795
PEAK_ALT_23658	chr6	84266236	84267360
PEAK_LNK_16536	chr4	135915981	135917245
PEAK_LNK_5978	chr2	59533111	59534983
PEAK_LNK_37337	chr10	44379650	44381565
PEAK_ALT_14268	chr4	45920404	45921476
PEAK_LNK_15936	chr4	123961623	123962737
PEAK_LNK_37342	chr10	44440425	44442469
PEAK_ALT_60380	chr17	65710202	65711405
PEAK_ALT_12378	chr3	123122198	123123248
PEAK_REF_50132	chr13	112510693	112511821
PEAK_ALT_46801	chr12	108502972	108504741
PEAK_LNK_14092	chr4	40875293	40877911
PEAK_ALT_37746	chr10	62252357	62253918
PEAK_LNK_46238	chr12	86320327	86321554
PEAK_LNK_31985	chr8	108946400	108951309
PEAK_LNK_51822	chr14	67575365	67576700
PEAK_ALT_729	chr1	39069043	39070408
PEAK_ALT_7739	chr2	125265874	125267163
PEAK_ALT_43153	chr11	97059782	97060867
PEAK_LNK_53226	chr15	7834063	7835975
PEAK_LNK_60612	chr17	71855789	71857347
PEAK_LNK_39060	chr10	95217406	95219562
PEAK_ALT_53355	chr15	12384695	12385947
PEAK_LNK_15366	chr4	102930009	102931676
PEAK_ALT_61622	chr18	23936254	23937662
PEAK_ALT_28541	chr7	126988893	126990292
PEAKF1_REF_12488	chr3	127451873	127453358
PEAK_LNK_38736	chr10	86273147	86274928
PEAK_ALT_7315	chr2	107023119	107024304
PEAK_LNK_22584	chr6	34954967	34957162
PEAK_ALT_45955	chr12	78937437	78938908
PEAK_ALT_41441	chr11	50786951	50788043
PEAK_LNK_64335	chr19	28707555	28709181
PEAK_REF_21693	chr5	149091112	149092151
PEAK_LNK_43674	chr11	107369172	107370755
PEAK_LNK_14189	chr4	43992700	43993888
PEAK_REF_30186	chr8	44942814	44943867
PEAK_LNK_55622	chr15	98603342	98604999
PEAK_ALT_65314	chr19	57767991	57769168
PEAK_ALT_54294	chr15	59173181	59175307
PEAK_REF_11807	chr3	102183702	102184531
PEAK_LNK_54323	chr15	59827556	59829316
PEAK_REF_15312	chr4	100743536	100744272
PEAK_LNK_3273	chr1	155703994	155705868
PEAK_ALT_26280	chr7	34461780	34462676
PEAK_ALT_18607	chr5	65842059	65843294
PEAK_LNK_29574	chr8	23817316	23818455
PEAK_ALT_52884	chr14	118288850	118289961
PEAK_LNK_36259	chr10	4352901	4356001
PEAK_ALT_46763	chr12	107303211	107304444
PEAK_ALT_54295	chr15	59193200	59195207
PEAK_LNK_32096	chr8	110788679	110790237
PEAK_ALT_64405	chr19	30150988	30152066
PEAK_ALT_49712	chr13	99537806	99540102
PEAK_LNK_61391	chr18	12294095	12295533
PEAK_ALT_5845	chr2	52555920	52557195
PEAK_LNK_30631	chr8	61531624	61534257
PEAK_LNK_48294	chr13	48801582	48804092
PEAK_ALT_55750	chr15	100891703	100892921
PEAK_ALT_4091	chr1	181466072	181467448
PEAK_ALT_63367	chr18	82517345	82518478
PEAK_ALT_37191	chr10	41006767	41008813
PEAK_LNK_52045	chr14	75539562	75541350
PEAK_LNK_45180	chr12	51704459	51706420
PEAK_LNK_18574	chr5	65156838	65159385
PEAK_LNK_18947	chr5	76805216	76807064
PEAK_LNK_12019	chr3	108457687	108459326
PEAK_LNK_9344	chr2	173158604	173160596
PEAK_LNK_36007	chr9	118082259	118084374
PEAK_ALT_53055	chr14	122202035	122203597
PEAKF1_REF_28833	chr7	135802566	135803657
PEAK_ALT_17383	chr5	5267952	5269378
PEAK_LNK_20530	chr5	122680174	122682258
PEAK_LNK_12020	chr3	108471331	108473320
PEAK_LNK_11819	chr3	102601888	102603267
PEAKF1_REF_13057	chr3	146059400	146060493
PEAK_LNK_50112	chr13	112181819	112182945
PEAK_ALT_40659	chr11	19745670	19746463
PEAK_ALT_8413	chr2	151599789	151601211
PEAK_LNK_28523	chr7	126748902	126750308
PEAK_LNK_61835	chr18	34166495	34168541
PEAK_LNK_19716	chr5	105951117	105952890
PEAK_ALT_36242	chr10	3956171	3957231
PEAK_LNK_59769	chr17	45244043	45245350
PEAK_REF_24566	chr6	121260539	121261226
PEAK_LNK_16254	chr4	130974208	130976691
PEAK_LNK_12976	chr3	143954025	143955186
PEAK_ALT_29213	chr8	8856138	8857140
PEAK_LNK_62769	chr18	65518460	65520075
PEAK_LNK_58008	chr16	85472589	85473823
PEAK_LNK_36669	chr10	20625321	20627039
PEAK_REF_23395	chr6	71002038	71002716
PEAK_ALT_8606	chr2	155809752	155810879
PEAK_ALT_59762	chr17	45143201	45145124
PEAK_LNK_21661	chr5	148787398	148788938
PEAK_ALT_58708	chr17	11949543	11952348
PEAK_LNK_58710	chr17	11987763	11989274
PEAK_LNK_51961	chr14	72816286	72819089
PEAK_ALT_24410	chr6	115931770	115932486
PEAKF1_LNK_40221	chr10	128282930	128284659
PEAK_LNK_51168	chr14	47819950	47821430
PEAK_ALT_60423	chr17	66570510	66571568
PEAK_ALT_9298	chr2	172024409	172025814
PEAK_LNK_10422	chr3	51673150	51674457
PEAK_LNK_23718	chr6	86343427	86345057
PEAK_LNK_24721	chr6	125602868	125605068
PEAK_ALT_41474	chr11	51316730	51317981
PEAKF1_REF_54671	chr15	77013065	77014530
PEAK_ALT_46516	chr12	100289297	100291550
PEAK_ALT_5270	chr2	32109417	32110541
PEAK_ALT_3175	chr1	153218968	153220164
PEAK_ALT_63459	chr18	84102580	84103714
PEAK_ALT_53783	chr15	36069360	36070334
PEAK_LNK_41550	chr11	53731069	53732098
PEAK_LNK_24724	chr6	125689686	125691058
PEAKF1_REF_55816	chr15	102110554	102111861
PEAK_LNK_56768	chr16	32531409	32532799
PEAK_LNK_48422	chr13	52988612	52990290
PEAK_ALT_54244	chr15	57821948	57823880
PEAK_ALT_13309	chr3	154547143	154549328
PEAK_REF_34706	chr9	76029325	76030328
PEAK_LNK_39930	chr10	121062053	121064804
PEAK_ALT_65042	chr19	48001172	48002307
PEAK_ALT_50890	chr14	32446396	32447487
PEAK_LNK_54978	chr15	83790622	83792808
PEAK_LNK_2815	chr1	135865307	135866774
PEAK_LNK_55621	chr15	98593740	98595055
PEAK_LNK_59089	chr17	27039594	27041043
PEAK_ALT_8711	chr2	158510241	158512136
PEAK_LNK_61079	chr17	87569943	87572221
PEAK_LNK_53204	chr15	6980449	6981990
PEAK_LNK_10512	chr3	53485409	53487331
PEAK_LNK_43499	chr11	102885203	102886913
PEAK_ALT_59743	chr17	44607342	44608424
PEAK_LNK_51385	chr14	55063434	55066469
PEAK_LNK_58966	chr17	24504435	24507606
PEAK_ALT_27762	chr7	98144626	98145764
PEAK_ALT_24722	chr6	125642207	125643458
PEAK_ALT_61378	chr18	11805911	11807239
PEAK_ALT_46187	chr12	85139555	85141535
PEAK_LNK_35884	chr9	114487073	114488674
PEAK_ALT_50121	chr13	112297127	112298342
PEAK_ALT_4392	chr1	190664440	190666121
PEAK_ALT_9901	chr3	28327630	28329016
PEAK_ALT_50096	chr13	111882433	111883793
PEAK_ALT_45257	chr12	53886882	53888516
PEAK_ALT_53859	chr15	37770276	37771941
PEAK_ALT_32531	chr8	121784493	121785933
PEAK_ALT_39986	chr10	122023483	122024953
PEAK_LNK_13480	chr4	8750948	8753718
PEAK_LNK_37340	chr10	44409751	44411108
PEAK_LNK_59325	chr17	31330569	31331671
PEAK_LNK_45900	chr12	76981107	76982635
PEAK_ALT_10506	chr3	53323305	53324918
PEAK_LNK_36250	chr10	4110302	4112113
PEAK_LNK_5729	chr2	48466111	48467569
PEAK_LNK_56552	chr16	25865516	25866829
PEAK_LNK_35869	chr9	113990000	113991447
PEAK_ALT_49964	chr13	107773425	107777114
PEAK_LNK_40540	chr11	14419756	14421101
PEAK_ALT_6266	chr2	69248099	69249225
PEAKF1_REF_19173	chr5	90166272	90167355
PEAKF1_REF_59820	chr17	46103874	46105163
PEAK_ALT_35964	chr9	116346564	116347475
PEAK_REF_21367	chr5	142717667	142718870
PEAKF1_LNK_12415	chr3	123891930	123893156
PEAK_LNK_29599	chr8	24592567	24594453
PEAK_LNK_57421	chr16	56113124	56114386
PEAK_ALT_20743	chr5	127504641	127507098
PEAK_LNK_23833	chr6	89679359	89680794
PEAK_ALT_13869	chr4	31761507	31762611
PEAK_ALT_39853	chr10	120089297	120090266
PEAK_ALT_50864	chr14	31555505	31556624
PEAK_ALT_44845	chr12	33161896	33163356
PEAK_LNK_32902	chr9	14662006	14663742
PEAK_LNK_50936	chr14	33938923	33939950
PEAK_LNK_10486	chr3	52896360	52897954
PEAK_ALT_53363	chr15	12629613	12630842
PEAK_ALT_40799	chr11	24005217	24006777
PEAK_LNK_52857	chr14	117905127	117906636
PEAK_LNK_52890	chr14	118368792	118370258
PEAK_ALT_36074	chr9	119718198	119719960
PEAK_ALT_15780	chr4	118580509	118582324
PEAK_ALT_38089	chr10	70039583	70040597
PEAK_REF_39931	chr10	121077045	121077982
PEAK_ALT_23578	chr6	82477069	82478560
PEAK_LNK_14923	chr4	83173192	83174405
PEAK_ALT_6029	chr2	60750739	60752129
PEAK_ALT_17855	chr5	30342354	30343800
PEAK_LNK_4870	chr2	18851515	18853675
PEAK_LNK_9332	chr2	172856638	172858127
PEAK_LNK_7680	chr2	122336946	122338338
PEAK_LNK_10551	chr3	54788470	54789879
PEAK_LNK_15431	chr4	105839691	105841107
PEAK_ALT_29064	chr7	144283554	144285481
PEAK_ALT_35796	chr9	111021848	111023293
PEAK_LNK_5733	chr2	48753895	48755203
PEAK_ALT_28399	chr7	121835350	121836166
PEAK_LNK_48172	chr13	46428501	46429872
PEAK_LNK_41107	chr11	36045363	36048235
PEAK_ALT_19289	chr5	92917897	92919628
PEAK_LNK_52046	chr14	75582674	75584887
PEAK_LNK_18388	chr5	53322263	53323280
PEAK_ALT_24752	chr6	127010050	127012159
PEAK_ALT_56677	chr16	30776293	30777591
PEAK_ALT_38253	chr10	75325356	75326752
PEAK_ALT_35936	chr9	115454403	115456012
PEAK_ALT_521	chr1	33635760	33637169
PEAK_LNK_16136	chr4	128861114	128862961
PEAKF1_LNK_11370	chr3	89142696	89143875
PEAK_ALT_29516	chr8	22668463	22670294
PEAK_LNK_9609	chr3	9110517	9111784
PEAK_LNK_10552	chr3	54793699	54794829
PEAK_ALT_52547	chr14	101917230	101918445
PEAK_LNK_57297	chr16	50165624	50168007
PEAK_ALT_29227	chr8	9151862	9153098
PEAK_LNK_51676	chr14	63342593	63344566
PEAK_ALT_47978	chr13	41025437	41026588
PEAK_ALT_42800	chr11	87870993	87871930
PEAK_REF_43738	chr11	109244545	109245180
PEAK_ALT_37338	chr10	44389871	44390823
PEAK_ALT_19492	chr5	100562488	100563709
PEAK_ALT_59987	chr17	49760870	49762265
PEAKF1_REF_60428	chr17	66697238	66698367
PEAK_LNK_19200	chr5	90647348	90649938
PEAK_ALT_19327	chr5	96549200	96550496
PEAK_REF_28622	chr7	128267123	128267813
PEAK_LNK_2685	chr1	132843252	132844951
PEAKF1_REF_63156	chr18	76467718	76468856
PEAK_LNK_32032	chr8	109650156	109651388
PEAKF1_REF_58282	chr16	93010444	93011392
PEAK_LNK_16466	chr4	134665632	134667311
PEAK_ALT_24102	chr6	100407955	100409574
PEAK_LNK_4607	chr2	6273296	6274906
PEAK_ALT_24091	chr6	100124923	100125825
PEAK_LNK_10919	chr3	69903080	69904344
PEAK_LNK_20238	chr5	117496386	117497661
PEAK_LNK_10417	chr3	51583364	51584960
PEAK_LNK_37892	chr10	67038677	67039905
PEAK_LNK_6660	chr2	76969073	76971750
PEAK_ALT_60821	chr17	79999418	80001399
PEAK_LNK_23010	chr6	51421605	51423007
PEAK_ALT_36088	chr9	120051450	120052745
PEAK_ALT_24497	chr6	119240924	119242178
PEAK_LNK_19864	chr5	110620086	110621767
PEAK_LNK_23076	chr6	52442870	52444234
PEAK_LNK_2654	chr1	132228450	132229843
PEAK_LNK_29351	chr8	13640624	13642118
PEAK_ALT_3743	chr1	170301079	170302586
PEAK_ALT_11041	chr3	79403579	79404942
PEAK_LNK_63453	chr18	83983712	83985580
PEAK_ALT_32217	chr8	113956180	113957434
PEAK_LNK_26423	chr7	37479104	37481462
PEAK_LNK_2107	chr1	91892748	91894356
PEAK_ALT_10062	chr3	34574943	34577176
PEAK_LNK_20872	chr5	130834919	130836474
PEAK_ALT_63969	chr19	15934317	15935441
PEAK_ALT_39084	chr10	95447443	95448749
PEAK_ALT_29346	chr8	13405335	13406619
PEAK_LNK_32897	chr9	14523859	14525494
PEAK_ALT_2438	chr1	120384816	120385806
PEAK_ALT_46726	chr12	106128287	106129618
PEAK_ALT_37617	chr10	59566712	59567799
PEAK_ALT_42525	chr11	79790022	79791323
PEAK_ALT_46844	chr12	110045564	110047076
PEAK_LNK_60808	chr17	79816435	79818527
PEAK_ALT_43709	chr11	108270910	108271984
PEAK_ALT_58254	chr16	92348226	92349800
PEAK_ALT_10488	chr3	52960316	52961665
PEAK_LNK_7239	chr2	105026517	105028178
PEAK_LNK_63322	chr18	81009714	81011069
PEAK_ALT_39854	chr10	120104889	120106190
PEAK_ALT_28666	chr7	130000310	130001534
PEAK_LNK_29208	chr8	8790609	8792150
PEAK_LNK_50686	chr14	25107559	25109431
PEAK_LNK_65219	chr19	56061332	56063204
PEAK_LNK_54697	chr15	77933377	77934933
PEAK_LNK_45987	chr12	80002353	80003993
PEAK_ALT_18620	chr5	66008139	66009675
PEAK_LNK_64779	chr19	42461595	42463422
PEAK_LNK_54523	chr15	73856711	73858275
PEAK_ALT_5441	chr2	35739149	35740434
PEAK_LNK_59775	chr17	45375626	45377362
PEAK_ALT_31376	chr8	88006287	88007147
PEAK_ALT_39069	chr10	95315152	95316305
PEAK_LNK_53233	chr15	8065212	8066404
PEAK_LNK_11056	chr3	79854206	79856645
PEAK_ALT_64624	chr19	37790017	37791473
PEAK_LNK_14555	chr4	57338012	57339920
PEAK_ALT_54252	chr15	57928929	57929817
PEAK_ALT_63768	chr19	7185636	7186937
PEAK_LNK_61836	chr18	34201548	34203511
PEAK_LNK_6004	chr2	60088554	60090684
PEAK_ALT_34077	chr9	58003937	58005086
PEAK_LNK_41751	chr11	59547722	59549769
PEAK_LNK_43891	chr11	113637822	113639232
PEAK_LNK_9307	chr2	172256567	172258304
PEAK_LNK_16971	chr4	148734316	148735624
PEAK_ALT_13034	chr3	145631857	145633285
PEAK_LNK_53205	chr15	7026829	7028547
PEAK_LNK_2397	chr1	118825085	118826546
PEAK_LNK_51629	chr14	62144121	62145589
PEAK_LNK_21515	chr5	146712185	146713473
PEAK_LNK_25321	chr6	145350384	145352625
PEAK_ALT_22694	chr6	38686676	38687747
PEAK_ALT_58278	chr16	92844986	92846526
PEAK_LNK_15317	chr4	101002192	101004183
PEAK_ALT_59317	chr17	31197882	31199858
PEAK_LNK_53258	chr15	8667293	8669011
PEAK_LNK_49972	chr13	107969765	107971428
PEAK_LNK_7736	chr2	125163415	125164901
PEAK_ALT_18039	chr5	35883814	35885061
PEAK_LNK_38162	chr10	71325102	71327296
PEAK_LNK_53064	chr14	122366514	122368152
PEAK_ALT_46679	chr12	105395063	105396551
PEAK_LNK_51550	chr14	59715007	59716598
PEAK_LNK_50135	chr13	112562396	112563994
PEAK_ALT_22434	chr6	30572371	30573685
PEAK_LNK_24352	chr6	114299135	114300468
PEAK_LNK_34198	chr9	61853960	61855885
PEAK_ALT_860	chr1	42353197	42354283
PEAK_LNK_6933	chr2	90666738	90668287
PEAK_LNK_12301	chr3	121588298	121590866
PEAK_REF_27335	chr7	79255430	79256184
PEAKF1_REF_56524	chr16	24254786	24256107
PEAK_ALT_42526	chr11	79806544	79807814
PEAK_LNK_43897	chr11	113708342	113711018
PEAK_LNK_36036	chr9	118861834	118863344
PEAK_REF_51195	chr14	48608329	48609228
PEAK_ALT_56120	chr16	11517421	11518835
PEAK_ALT_57760	chr16	73027314	73028781
PEAK_ALT_60578	chr17	70928992	70929740
PEAK_LNK_51066	chr14	45184620	45185545
PEAK_ALT_18523	chr5	64256163	64257517
PEAK_LNK_29199	chr8	8575933	8577561
PEAK_LNK_24882	chr6	134413666	134415041
PEAK_LNK_25352	chr6	146076994	146078944
PEAK_LNK_26804	chr7	49699641	49701856
PEAK_LNK_27338	chr7	79386105	79387587
PEAK_LNK_55316	chr15	93212166	93213569
PEAK_LNK_63121	chr18	75705288	75706826
PEAK_ALT_5967	chr2	59387244	59388129
PEAK_ALT_26813	chr7	49881459	49883514
PEAK_LNK_35239	chr9	96824118	96825826
PEAK_LNK_5124	chr2	28750617	28752454

[truncated: 5 more sheets: ME10, ME11, ME12, ME13, ME14]
